# Supplementary material for: In vivo mapping of cellular resolution neuropathology in brain ischemia with diffusion MRI
Source: PubMed Central journal article supplement — Sci Adv. 2024 Jul 17;10(29):eadk1817. doi: 10.1126/sciadv.adk1817 (PMC466947; doi:10.1126/sciadv.adk1817), 2024-07-17
Supplement: sciadv.adk1817_sm.pdf [file sciadv.adk1817_sm.pdf]

Supplementary Materials for  
**In vivo mapping of cellular resolution neuropathology in brain ischemia with  
diffusion MRI**

Dan Wu *et al.*

Corresponding author: Dan Wu, danwu.bme@zju.edu.cn; Jiangyang Zhang, jiangyang.zhang@nyulangone.org

*Sci. Adv.* **10**, eadk1817 (2024)  
DOI: 10.1126/sciadv.adk1817

**This PDF file includes:**

Figs. S1 to S9  
Tables S1 to S8

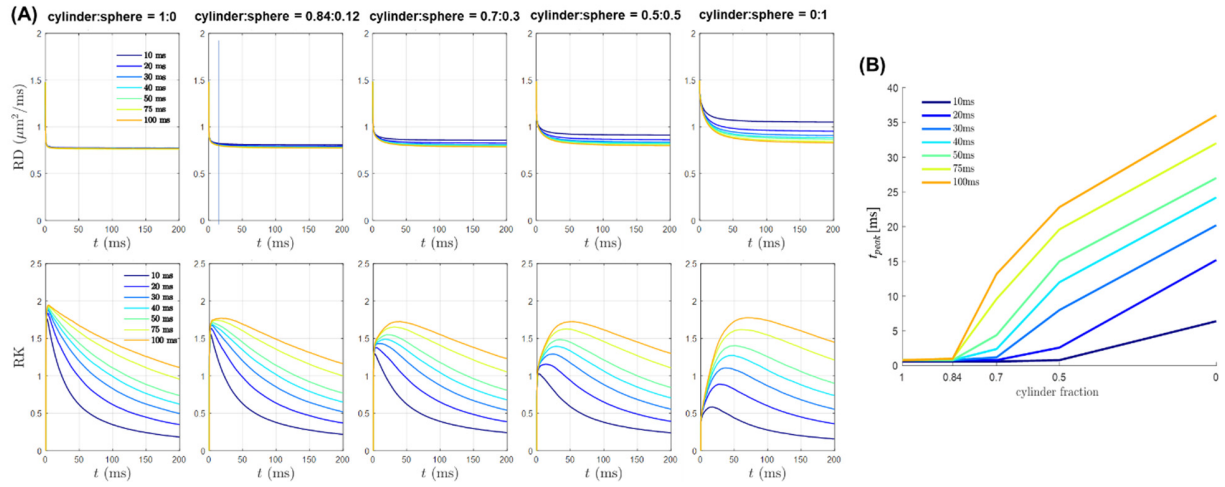

**Fig. S1. Monte-Carlo simulations of the mixed phantom of cylinders and spheres.** The cylinders were set at  $1.2 \mu\text{m}$  diameter with a dispersion degree of  $40^\circ$ , and spheres were set at  $12 \mu\text{m}$ . The cylinders and spheres were combined at the signal level with different ratios, both at an intracellular volume fraction of 50%. **(A)** The  $t$ -dependent changes in diffusivity and kurtosis with varying transmembrane exchange times ( $\tau_{ex}$ , from 10-100ms). **(B)** The change in peak time ( $t_{peak}$ ) with the fraction of cylinders (from 1 to 0) and  $\tau_{ex}$  (from 10-100ms).

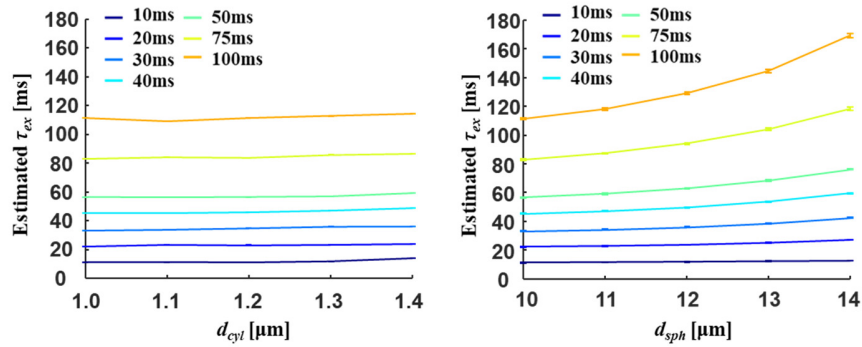

**Fig. S2. The relationship between the estimated  $\tau_{ex}$  and the sizes of cylinders and spheres in the simulations.** The change in the estimated  $\tau_{ex}$  with the cylinder size ranging from 1.0 to 1.4  $\mu$ m and the preset  $\tau_{ex}$  ranging from 10 to 100 ms, while the sphere size was fixed at 10  $\mu$ m (left); and the change in  $\tau_{ex}$  with the sphere size ranging from 10 to 14  $\mu$ m and the preset  $\tau_{ex}$  ranging from 10 to 100 ms, while the cylinder size was fixed at 1.0  $\mu$ m (right). Note the estimated  $\tau_{ex}$  deviated from the preset values for large spheres, potentially because the diffusion inside large spheres was still not approximately Gaussian at the t scale used in simulations (i.e., t is not long enough for large spheres) and thus did not meet the Gaussian assumption of the Kärger model in these scenarios.

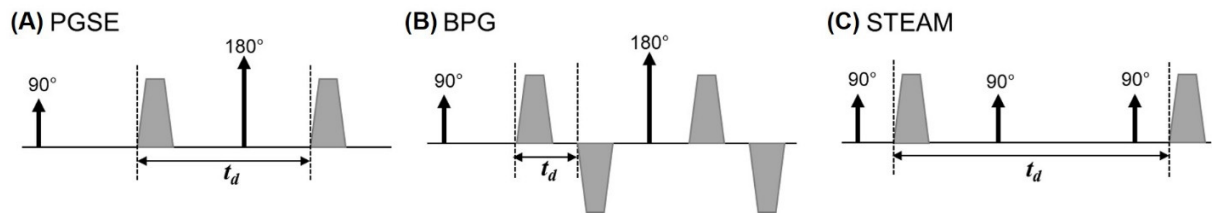

**Fig. S3. Schematics of the pulse sequences for different diffusion encoding schemes. (A)** pulsed gradient spin-echo (PGSE), **(B)** bipolar pulsed gradient (BPG), and **(C)** stimulated echo acquisition mode (STEAM). The effective diffusion time ( $t_d$ ) are indicated in each scheme.

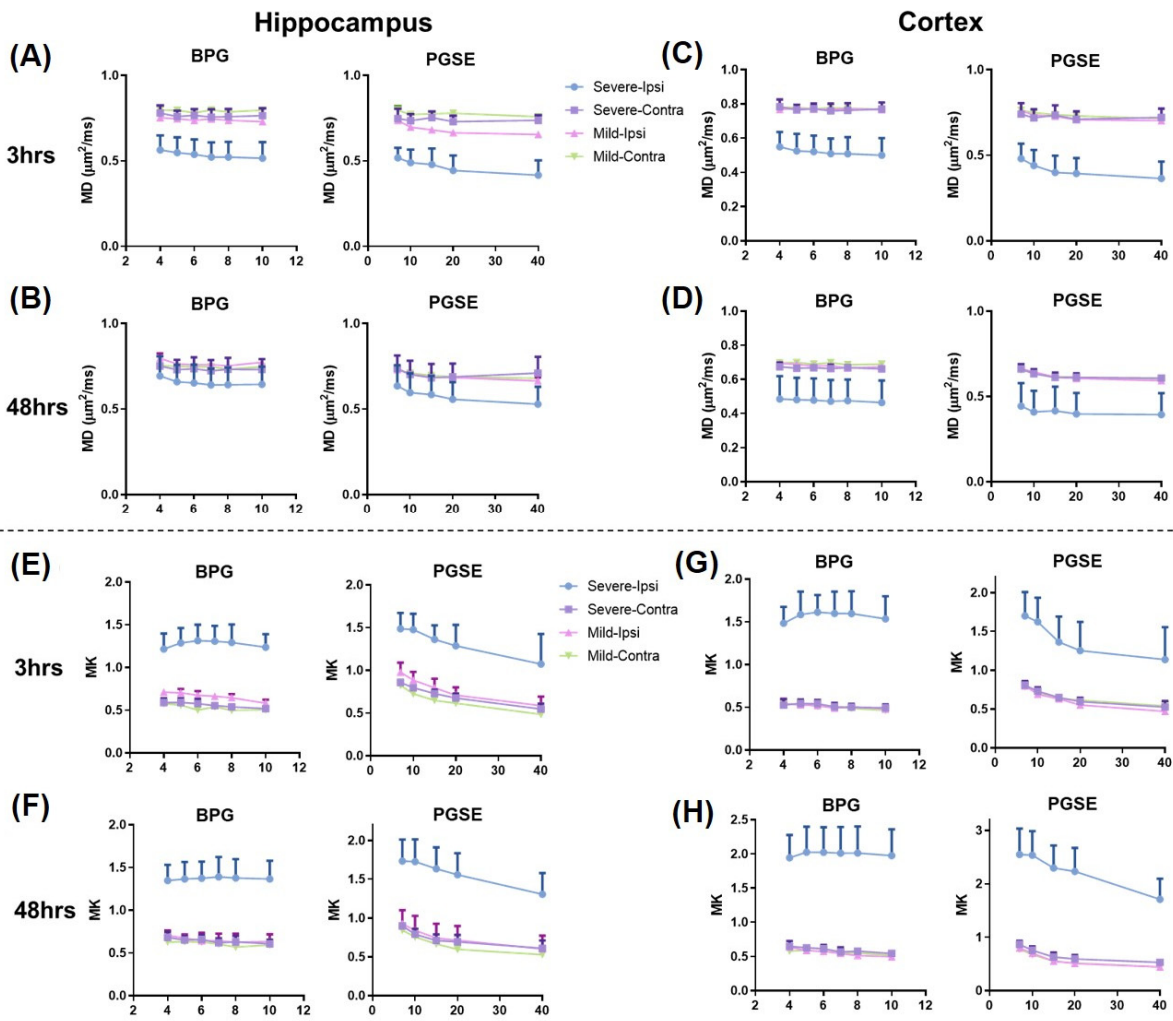

**Fig. S4. *t*-dependent change in mean diffusivity (MD) and mean kurtosis (MK).** (A-D) MD, and (E-H) MK measured in the hippocampus and cortex of HI-injured mouse brains at 3 hrs and 48 hrs after injury, using the BPG and PGSE sequences.

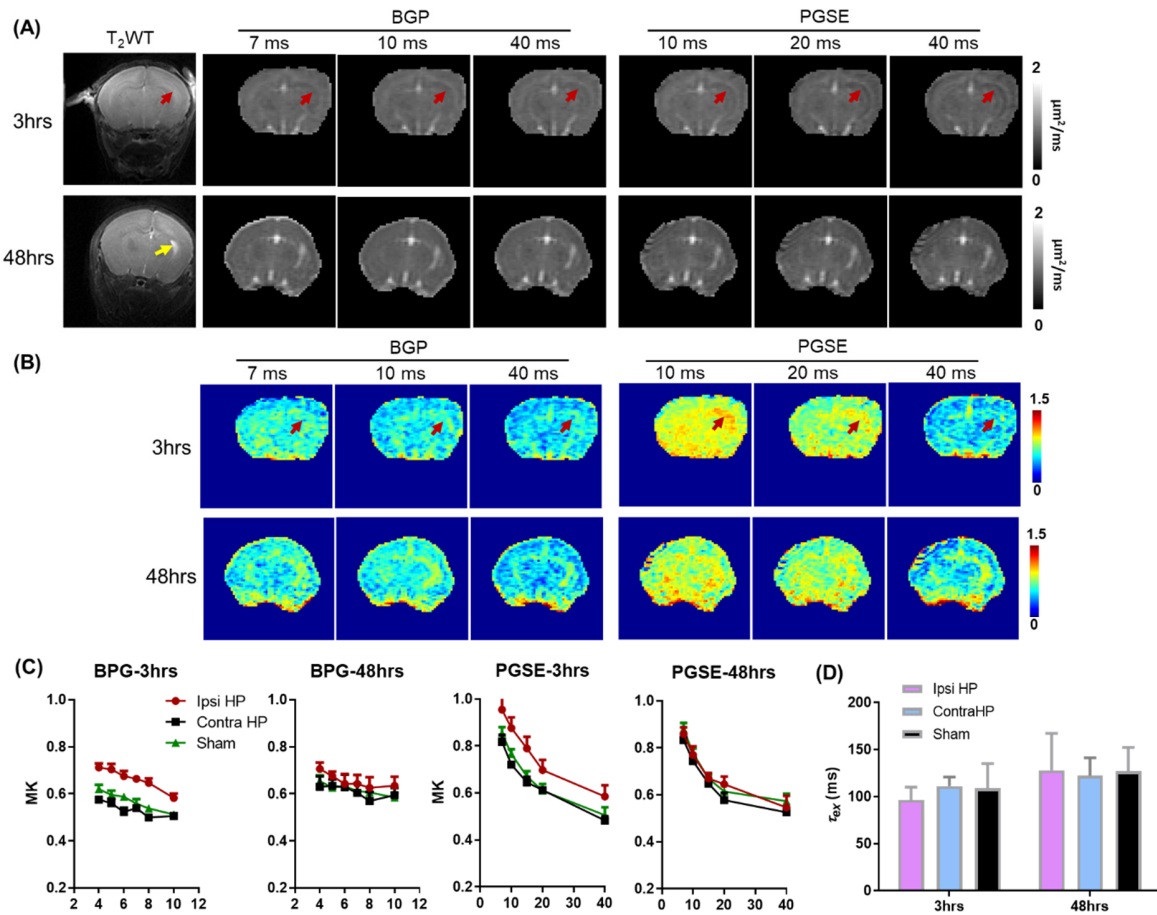

**Fig. S5.  $t$ DKI in HI-injured mice with mild-to-moderate injury.** (A-B) Diffusivity and kurtosis maps of a moderately injured mouse brain scanned at 3 hrs and 48 hrs after the HI onset with  $t$  ranging from 4-40 ms, using a combination of BPG and PGSE sequences. The red arrows point to reduced diffusivity and elevated kurtosis in the ipsilateral hippocampus at 3 hrs, which eventually led to cell death and enlarged ventricle at 48 hrs (yellow arrow). (C)  $t$ -dependent change in mean kurtosis (MK) between 4-10 ms did not show an apparent kurtosis peak, and kurtosis tails showed a similar rate of decay between 7-40 ms. (D) Statistical comparison of  $\tau_{ex}$  between the ipsilateral and contralateral hippocampus and sham mice did not show statistical difference, either at 3 hrs ( $n=10$ ) or 48 hrs ( $n=5$ ) after HI.

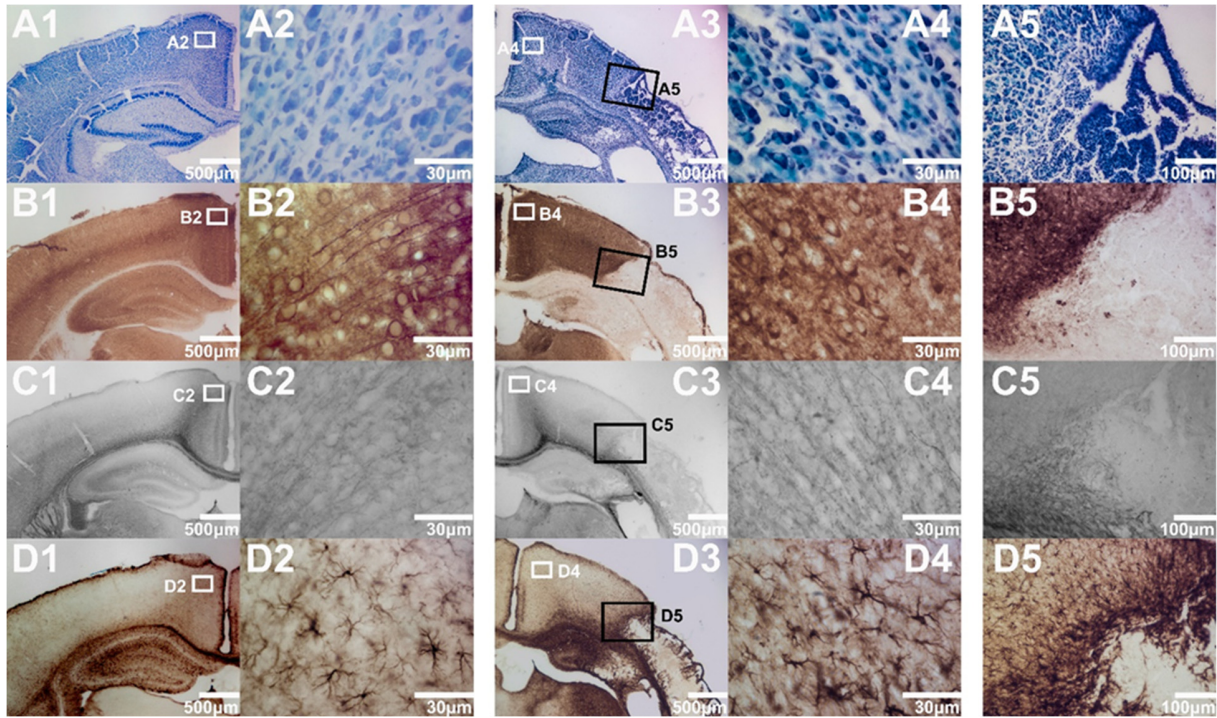

**Fig. S6. Pathology of the neurons, astrocytes, and cellular processes of a neonatal brain at 48 hrs after HI injury, corresponding to the mouse brain in Fig. 5. (A)** Nissl staining of the contralateral (A1) and ipsilateral (A3) brain with zoomed-in views of the cingulate cortex (A2 and A4) and the junction between cingulate and sensory cortex (A5). The same configuration is used for MAP2 (B), Neurofilament (C), and GFAP (D) to characterize the pathology of the dendrite, axons, and astrocytes.

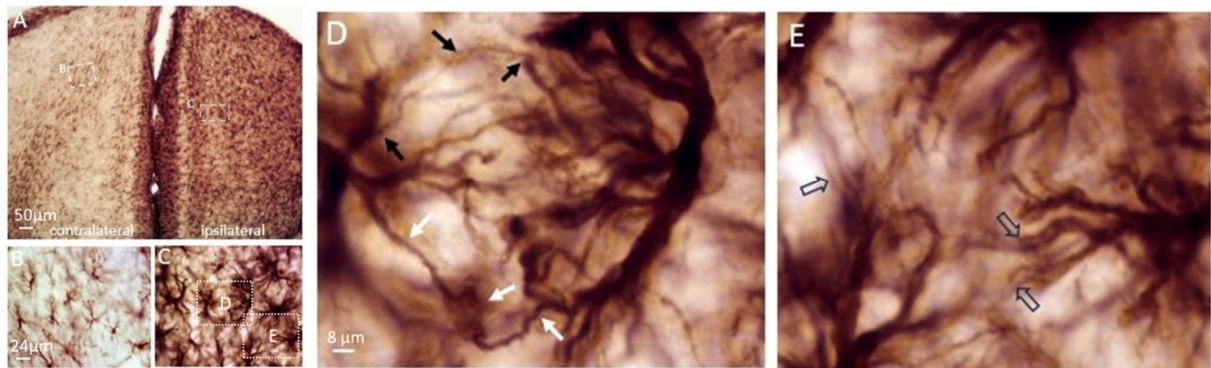

**Fig. S7. Acute astrocytic activation in a neonatal mouse brain at 3 hrs after HI-injury.** (A-C) GFAP staining shows prominent astrocyte activation in the ipsilateral cingulate compared to the contralateral cingulate cortex (same as **Fig. 5H**). (D-E) Zoomed-in views of (C) that shows apparent swelling in the astrocytic processes, as indicated by the arrows.



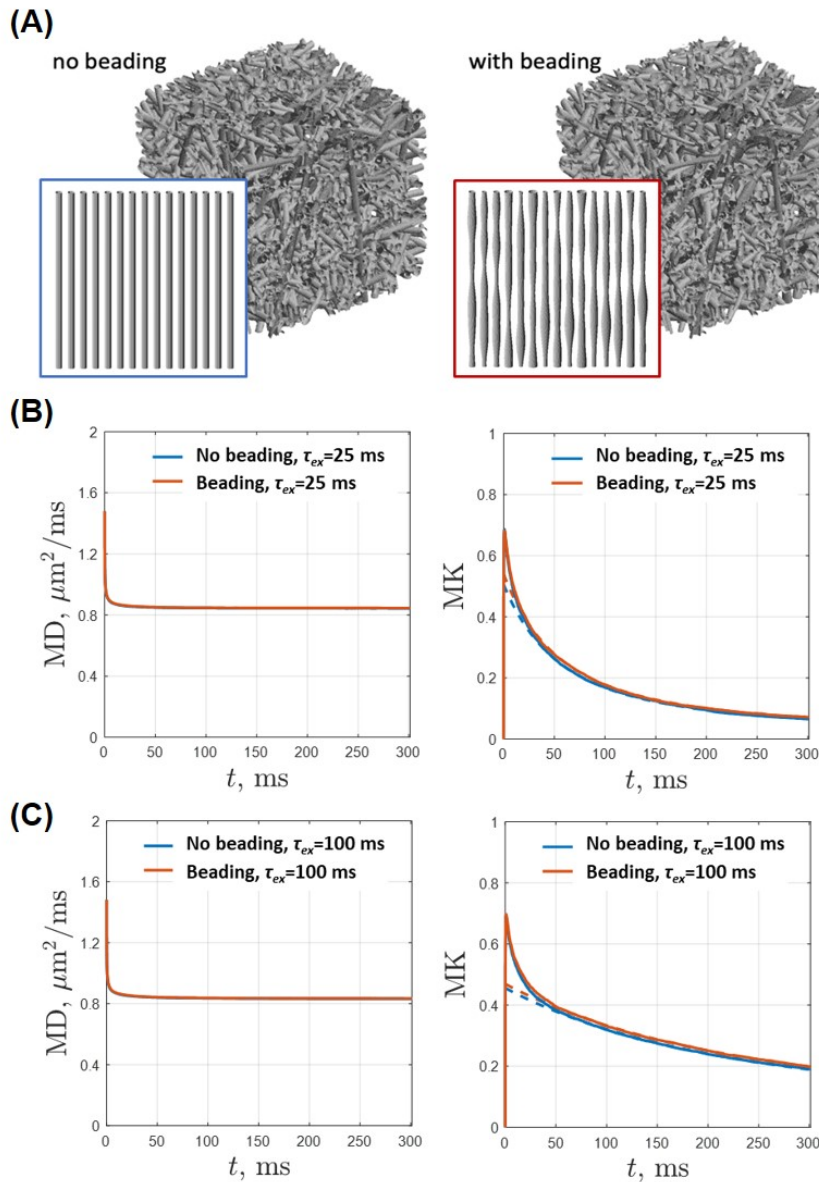

**Fig. S8. Diffusion simulations in two substrates composed of randomly positioned, randomly oriented fibers with and without beadings.** (A) Illustration of neurite phantoms with and without beading. The simulated  $t$ -dependent mean diffusivity (MD) and mean kurtosis (MK) in the two substrates with preset  $\tau_{ex}$ s of 25 ms (B) and 100ms (C). The MD and MK curves with and without beading are almost identical, indicating the diffusion coarse-graining over the beading structure has a negligible effect on  $t$ -dependence. Dashed curves indicate Kärger model fitting results.

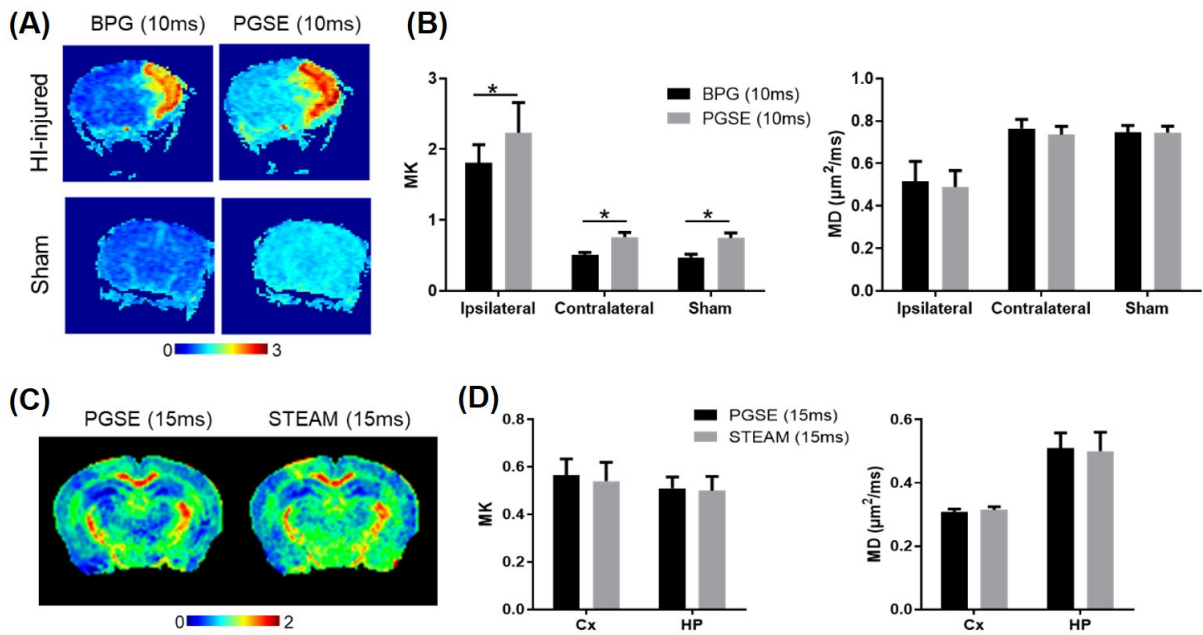

**Fig. S9. Comparisons of different diffusion MRI encoding schemes.** (A) BPG and PGSE based kurtosis maps with a  $t$  of 10 ms from HI-injured and sham mice. (B) Statistical comparison showed significantly lower ( $p < 0.05$ ,  $n = 6$ ) MK values obtained using the BPG sequence than those obtained using the PGSE sequence, while the MD values obtained using the two sequences were comparable in both injured and sham mice. (C) PGSE and STEAM based kurtosis maps with a  $t$  of 15 ms from a normal mouse brain. (D) Statistical comparison showed no difference ( $p > 0.05$ ,  $n = 5$ ) in MK or MD values between the two sequences.

**Table S1. Root Mean Square Error (RMSE) of the estimated  $\tau_{ex}$  at different baseline settings and different SNRs.**

| <b>RMSE of <math>\tau_{ex}</math> [ms] for the cylinder phantoms</b> |           |           |           |            |            |
|----------------------------------------------------------------------|-----------|-----------|-----------|------------|------------|
| <b><math>\tau_{ex}</math> [ms] \ SNR</b>                             | <b>20</b> | <b>30</b> | <b>50</b> | <b>100</b> | <b>INF</b> |
| <b>10</b>                                                            | 7.95      | 3.28      | 2.00      | 1.00       | 0.81       |
| <b>20</b>                                                            | 3.98      | 3.00      | 1.64      | 0.83       | 0.42       |
| <b>30</b>                                                            | 4.41      | 2.56      | 1.29      | 0.67       | 0.36       |
| <b>40</b>                                                            | 3.90      | 1.89      | 0.78      | 0.28       | 0.14       |
| <b>50</b>                                                            | 2.61      | 0.91      | 1.01      | 1.35       | 1.52       |
| <b>75</b>                                                            | 3.65      | 1.60      | 0.57      | 0.22       | 0.25       |
| <b>100</b>                                                           | 4.70      | 2.51      | 1.37      | 0.87       | 0.68       |
| <b>RMSE of <math>\tau_{ex}</math> [ms] for the sphere phantoms</b>   |           |           |           |            |            |
| <b><math>\tau_{ex}</math> [ms] \ SNR</b>                             | <b>20</b> | <b>30</b> | <b>50</b> | <b>100</b> | <b>INF</b> |
| <b>10</b>                                                            | 26.30     | 14.41     | 8.75      | 7.24       | 7.74       |
| <b>20</b>                                                            | 7.91      | 5.29      | 5.14      | 5.67       | 6.19       |
| <b>30</b>                                                            | 4.13      | 4.46      | 5.34      | 5.87       | 6.20       |
| <b>40</b>                                                            | 6.18      | 7.83      | 8.82      | 9.29       | 9.53       |
| <b>50</b>                                                            | 7.37      | 8.98      | 9.86      | 10.26      | 10.44      |
| <b>75</b>                                                            | 14.98     | 16.37     | 17.05     | 17.30      | 17.34      |
| <b>100</b>                                                           | 25.63     | 26.65     | 27.07     | 27.15      | 27.03      |

**Table S2. Summary of the *in vivo* mouse brain experiment of neonatal HI injury.** The numbers of mice that had complete *t*DKI scans at 3 hrs and 48 hrs after HI for each group. Note that, among the 41 mice used in this study, not all mice had complete good-quality *t*DKI scans due to insufficient scan time, animal death, image quality issues, etc.

|                 | <b>Severe injury</b> | <b>Mild/moderate</b> | <b>Sham</b> |
|-----------------|----------------------|----------------------|-------------|
| <b>3hr MRI</b>  | 12                   | 10                   | 6           |
| <b>48hr MRI</b> | 8 (follow-up)        | 6 (follow-up)        | 5           |

**Table S3. Statistical analysis associated with Fig. 4C.** Differences in mean diffusivity (MD) and mean kurtosis (MK) between the ipsilateral and contralateral hippocampus of the severely HIE mice (n=12), as well as the sham mice (n=6), at 3 hrs after HI injury. The comparisons were performed for *t* from 4-10 ms using the bipolar pulsed gradient (BPG) and from 7-40 ms using the pulse gradient spin-echo (PGSE) sequence. The differences between each pair of comparison were shown. \*  $p < 0.05$ , \*\*  $p < 0.01$ , and \*\*\*  $p < 0.001$  by t-test.

|            | MD               |                |                  | MK               |                |                  |
|------------|------------------|----------------|------------------|------------------|----------------|------------------|
|            | Ipsi -<br>Contra | Ipsi -<br>Sham | Contra -<br>Sham | Ipsi -<br>Contra | Ipsi -<br>Sham | Contra -<br>Sham |
| BPG 4 ms   | -0.046**         | -0.020         | 0.025            | 0.136***         | 0.092***       | -0.044           |
| BPG 5 ms   | -0.049**         | -0.026         | 0.023            | 0.145***         | 0.111***       | -0.033           |
| BPG 6 ms   | -0.044**         | -0.036*        | 0.008            | 0.152***         | 0.088***       | -0.065*          |
| BPG 7 ms   | -0.053***        | -0.026         | 0.027            | 0.125***         | 0.106***       | -0.019           |
| BPG 8 ms   | -0.048***        | -0.027         | 0.021            | 0.147**          | 0.108**        | -0.039           |
| BPG 10 ms  | -0.059***        | -0.037**       | 0.022            | 0.076            | 0.070          | -0.006           |
| PGSE 7 ms  | -0.034           | -0.005         | 0.029            | 0.137*           | 0.101          | -0.036           |
| PGSE 10 ms | -0.034           | -0.018         | 0.016            | 0.156**          | 0.111          | -0.045           |
| PGSE 15 ms | -0.044           | -0.030         | 0.014            | 0.145*           | 0.120*         | -0.025           |
| PGSE 20 ms | -0.061           | -0.029         | 0.032            | 0.085            | 0.087          | 0.002            |
| PGSE 40 ms | -0.056           | -0.037         | 0.019            | 0.102            | 0.080          | -0.022           |

**Table S4. Statistical analysis associated with Fig. 5C.** Comparing MD values in the cingulate and sensory cortex of the HIE mice at 3 hrs ( $n=12$ ) and 48 hrs ( $n=8$ ) after HI injury, for  $t$  from 4-40ms. The differences between each pair of comparison were shown. \*  $p<0.05$ , \*\*  $p<0.01$ , and \*\*\*  $p<0.001$  by paired t-test.

| MD         | 3 hrs               | 48 hrs              |                           |                        | 48hrs – 3hrs |           |
|------------|---------------------|---------------------|---------------------------|------------------------|--------------|-----------|
|            | Cingulate - Sensory | Cingulate - Sensory | Cingulate – contralateral | Contra - contralateral | Cingulate    | Sensory   |
| BPG 4 ms   | 0.0296              | 0.2505***           | 0.0339                    | -0.2166***             | -0.1608***   | 0.0601    |
| BPG 5 ms   | 0.0460              | 0.2407***           | 0.0326                    | -0.2081***             | -0.1689***   | 0.0258    |
| BPG 6 ms   | 0.0634              | 0.2554***           | 0.0289                    | -0.2265***             | -0.1787***   | 0.0133    |
| BPG 7 ms   | 0.0600              | 0.2526***           | 0.0334                    | -0.2192***             | -0.1809***   | 0.0118*** |
| BPG 8 ms   | 0.0628              | 0.2620***           | 0.0344                    | -0.2276***             | -0.1866***   | 0.0126    |
| BPG 10 ms  | 0.0651              | 0.2688***           | 0.0385                    | -0.2304***             | -0.2047***   | -0.0010   |
| PGSE 7 ms  | 0.0432              | 0.2544***           | -0.005                    | -0.2595***             | -0.1524**    | 0.0588    |
| PGSE 10 ms | 0.0293              | 0.2697***           | 0.0114                    | -0.2583***             | -0.1757***   | 0.0647    |
| PGSE 15 ms | 0.0301              | 0.2807***           | 0.0291                    | -0.2516***             | -0.1969***   | 0.0537    |
| PGSE 20 ms | 0.0364              | 0.2785***           | 0.0305                    | -0.2480***             | -0.2119***   | 0.0302    |
| PGSE 40 ms | 0.0385              | 0.2789***           | 0.0261                    | -0.2528***             | -0.2435***   | -0.0031   |

**Table S5. Statistical analysis associated with Fig. 5C.** Comparing MK values in the cingulate and sensory cortex of the HIE mice at 3 hrs (n=12) and 48 hrs (n=8) after HI injury, for *t* from 4-40ms. The differences between each pair of comparison were showed. \*  $p<0.05$ , \*\*  $p<0.01$ , and \*\*\*  $p<0.001$  by paired t-test.

| MK         | 3 hrs               | 48 hrs              |                           |                        | 48hrs – 3hrs |            |
|------------|---------------------|---------------------|---------------------------|------------------------|--------------|------------|
|            | Cingulate - sensory | Cingulate - sensory | Cingulate – contralateral | Contra - contralateral | Cingulate    | sensory    |
| BPG 4 ms   | 0.1139              | -0.8904***          | 0.4999**                  | 1.390***               | 0.3239       | -0.6804*** |
| BPG 5 ms   | 0.1435              | -0.9258***          | 0.5647**                  | 1.490***               | 0.3935       | -0.6757*** |
| BPG 6 ms   | 0.1213              | -0.9200***          | 0.5815***                 | 1.502***               | 0.3753       | -0.6660*** |
| BPG 7 ms   | 0.1155              | -0.9219***          | 0.6148***                 | 1.537***               | 0.4408*      | -0.5965*** |
| BPG 8 ms   | 0.1269              | -0.9460***          | 0.5634**                  | 1.509***               | 0.4642*      | -0.6087*** |
| BPG 10 ms  | 0.1924              | -0.9548***          | 0.5728**                  | 1.528***               | 0.4599*      | -0.6873*** |
| PGSE 7 ms  | 0.0602              | -1.130***           | 0.6384***                 | 1.769***               | 0.2751       | -0.9156*** |
| PGSE 10 ms | 0.2055              | -1.137***           | 0.7467***                 | 1.884***               | 0.3259       | -1.017***  |
| PGSE 15 ms | 0.2459              | -1.016***           | 0.7816***                 | 1.797***               | 0.3073       | -0.9545*** |
| PGSE 20 ms | 0.2891              | -0.9254***          | 0.7476***                 | 1.673***               | 0.3338       | -0.8808*** |
| PGSE 40 ms | 0.2469              | -0.5768**           | 0.6544***                 | 1.231***               | 0.3043       | -0.5194*   |

**Table S6. Basic demographic and clinical information of the stroke patients who underwent tDKI scans.**

|                                                        |                     |
|--------------------------------------------------------|---------------------|
| <b>No.</b>                                             | 5                   |
| <b>Age, mean (SD), y</b>                               | 70(12)              |
| <b>Sex</b>                                             |                     |
| Men                                                    | 0                   |
| Women                                                  | 5                   |
| <b>Medical history</b>                                 |                     |
| Hypertension                                           | 1                   |
| Hyperlipidemia                                         | 1                   |
| Previous stroke                                        | 1                   |
| Others (Insomnia)                                      | 1                   |
| None                                                   | 1                   |
| <b>Baseline clinical characteristics, median (IQR)</b> |                     |
| GCS score                                              | 13 (11-15)          |
| NIHSS score                                            | 11.3 (4-19.3)       |
| Systolic blood pressure, mm Hg                         | 157.6 (135.0-186.5) |
| Glycemia, mmol/Dl                                      | 6.4 (5.1-7.6)       |
| <b>Baseline imaging</b>                                |                     |
| Onset-to-imaging time, median (IQR), h                 | 4 (1-22)            |
| Site of occlusion                                      |                     |
| L-M1 and R-M1                                          | 1                   |
| L-M1                                                   | 1                   |
| R-M1                                                   | 3                   |
| <b>Treatment received</b>                              |                     |
| Intravenous thrombolysis alone                         | 1                   |
| Intravenous thrombolysis and thrombectomy              | 1                   |
| Thrombectomy alone                                     | 0                   |
| No reperfusion therapy                                 | 3                   |



**Table S7. Statistical analysis associated with Fig. 6D.** Comparing  $K_0$  and  $\tau_{ex}^*$  values in the lesions and contralateral uninjured regions of five stroke patients. The differences between the comparisons were showed. \*  $p < 0.05$ , \*\*  $p < 0.01$  by t-test.

|           | $K_0$          |                  |           | $\tau_{ex}^*$ [ms] |                  |           |
|-----------|----------------|------------------|-----------|--------------------|------------------|-----------|
|           | injured region | uninjured region | $p$ value | injured region     | uninjured region | $p$ value |
| Patient 1 | 0.9139         | 0.7786           | 0.0087**  | 94.75              | 122.90           | 0.0411*   |
| Patient 2 | 0.8426         | 0.6313           |           | 56.78              | 116.93           |           |
| Patient 3 | 0.7362         | 0.5424           |           | 176.98             | 230.47           |           |
| Patient 4 | 0.7482         | 0.5811           |           | 112.14             | 156.24           |           |
| Patient 5 | 0.9798         | 0.5151           |           | 85.96              | 121.17           |           |

**Table S8. The effective b-value in the b0 image (no diffusion-encoding) at different  $t$ 's in the DW-STEAM sequence.**

|                                                              |     |      |      |      |      |
|--------------------------------------------------------------|-----|------|------|------|------|
| <b>diffusion time<br/>[ms]</b>                               | 50  | 100  | 150  | 200  | 250  |
| <b>effective b value<br/>[ms/<math>\mu\text{m}^2</math>]</b> | 8.1 | 19.8 | 31.5 | 43.1 | 54.8 |
